# Supplementary material
Source: PubMed Central journal article supplement (PMC2289868)
Supplement: NIHMS1595-supplement-Table_S1.pdf [file NIHMS1595-supplement-Table_S1.pdf]

Supplemental Table 1. Glycans on the array

| CFG Glycan Number | Glycan Number on Figure | Glycan Structure                                                                                                                                         |
|-------------------|-------------------------|----------------------------------------------------------------------------------------------------------------------------------------------------------|
| 7                 | 1                       | $\alpha$ -D-Gal-Sp8                                                                                                                                      |
| 8                 | 2                       | $\alpha$ -D-Glc-Sp8                                                                                                                                      |
| 9                 | 3                       | $\alpha$ -D-Man-Sp8                                                                                                                                      |
| 10                | 4                       | $\alpha$ -GalNAc-Sp8                                                                                                                                     |
| 11                | 5                       | $\alpha$ -L-Fuc-Sp8                                                                                                                                      |
| 12                | 6                       | $\alpha$ -L-Fuc-Sp9                                                                                                                                      |
| 13                | 7                       | $\alpha$ -L-Rha-Sp8                                                                                                                                      |
| 14                | 8                       | $\alpha$ -Neu5Ac-Sp8                                                                                                                                     |
| 15                | 9                       | $\alpha$ -Neu5Ac-Sp11                                                                                                                                    |
| 16                | 10                      | $\beta$ -Neu5Ac-Sp8                                                                                                                                      |
| 17                | 11                      | $\beta$ -D-Gal-Sp8                                                                                                                                       |
| 18                | 12                      | $\beta$ -D-Glc-Sp8                                                                                                                                       |
| 19                | 13                      | $\beta$ -D-Man-Sp8                                                                                                                                       |
| 20                | 14                      | $\beta$ -GalNAc-Sp8                                                                                                                                      |
| 21                | 15                      | $\beta$ -GlcNAc-Sp0                                                                                                                                      |
| 22                | 16                      | $\beta$ -GlcNAc-Sp8                                                                                                                                      |
| 23                | 17                      | $\beta$ -GlcN(Gc)-Sp8                                                                                                                                    |
| 24                | 18                      | (Gal $\beta$ 1-4GlcNAc $\beta$ ) <sub>2</sub> -3,6-GalNAc $\alpha$ -Sp8                                                                                  |
| 25                | 19                      | GlcNAc $\beta$ 1-3(GlcNAc $\beta$ 1-4)(GlcNAc $\beta$ 1-6)GlcNAc-Sp8                                                                                     |
| 26                | 20                      | [3OSO <sub>3</sub> ][6OSO <sub>3</sub> ]Gal $\beta$ 1-4[6OSO <sub>3</sub> ]GlcNAc $\beta$ -Sp0                                                           |
| 27                | 21                      | [3OSO <sub>3</sub> ][6OSO <sub>3</sub> ]Gal $\beta$ 1-4GlcNAc $\beta$ -Sp0                                                                               |
| 28                | 22                      | [3OSO <sub>3</sub> ]Gal $\beta$ 1-4Glc $\beta$ -Sp8                                                                                                      |
| 29                | 23                      | [3OSO <sub>3</sub> ]Gal $\beta$ 1-4(6OSO <sub>3</sub> )Glc $\beta$ -Sp0                                                                                  |
| 30                | 24                      | [3OSO <sub>3</sub> ]Gal $\beta$ 1-4(6OSO <sub>3</sub> )Glc $\beta$ -Sp8                                                                                  |
| 31                | 25                      | [3OSO <sub>3</sub> ]Gal $\beta$ 1-3(Fuc $\alpha$ 1-4)GlcNAc $\beta$ -Sp8                                                                                 |
| 32                | 26                      | [3OSO <sub>3</sub> ]Gal $\beta$ 1-3GalNAc $\alpha$ -Sp8                                                                                                  |
| 33                | 27                      | [3OSO <sub>3</sub> ]Gal $\beta$ 1-3GlcNAc $\beta$ -Sp8                                                                                                   |
| 34                | 28                      | [3OSO <sub>3</sub> ]Gal $\beta$ 1-4(Fuc $\alpha$ 1-3)GlcNAc $\beta$ -Sp8                                                                                 |
| 35                | 29                      | [3OSO <sub>3</sub> ]Gal $\beta$ 1-4[6OSO <sub>3</sub> ]GlcNAc $\beta$ -Sp8                                                                               |
| 36                | 30                      | [3OSO <sub>3</sub> ]Gal $\beta$ 1-4GlcNAc $\beta$ -Sp0                                                                                                   |
| 37                | 31                      | [3OSO <sub>3</sub> ]Gal $\beta$ 1-4GlcNAc $\beta$ -Sp8                                                                                                   |
| 38                | 32                      | [3OSO <sub>3</sub> ]Gal $\beta$ -Sp8                                                                                                                     |
| 39                | 33                      | [4OSO <sub>3</sub> ][6OSO <sub>3</sub> ]Gal $\beta$ 1-4GlcNAc $\beta$ -Sp0                                                                               |
| 40                | 34                      | [4OSO <sub>3</sub> ]Gal $\beta$ 1-4GlcNAc $\beta$ -Sp8                                                                                                   |
| 41                | 35                      | 6-H <sub>2</sub> PO <sub>3</sub> Man $\alpha$ -Sp8                                                                                                       |
| 42                | 36                      | [6OSO <sub>3</sub> ]Gal $\beta$ 1-4Glc $\beta$ -Sp0                                                                                                      |
| 43                | 37                      | [6OSO <sub>3</sub> ]Gal $\beta$ 1-4Glc $\beta$ -Sp8                                                                                                      |
| 44                | 38                      | [6OSO <sub>3</sub> ]Gal $\beta$ 1-4GlcNAc $\beta$ -Sp8                                                                                                   |
| 45                | 39                      | [6OSO <sub>3</sub> ]Gal $\beta$ 1-4[6OSO <sub>3</sub> ]Glc $\beta$ -Sp8                                                                                  |
| 46                | 40                      | NeuAc $\alpha$ 2-3[6OSO <sub>3</sub> ]Gal $\beta$ 1-4GlcNAc $\beta$ -Sp8                                                                                 |
| 47                | 41                      | [6OSO <sub>3</sub> ]GlcNAc $\beta$ -Sp8                                                                                                                  |
| 48                | 42                      | 9-O-AcNeu5NAc $\alpha$ -Sp8                                                                                                                              |
| 49                | 43                      | 9-O-AcNeu5NAc $\alpha$ 2-6Gal $\beta$ 1-4GlcNAc $\beta$ -Sp8                                                                                             |
| 50                | 44                      | Man $\alpha$ 1-3(Man $\alpha$ 1-6)Man $\beta$ 1-4GlcNAc $\beta$ 1-4GlcNAc $\beta$ -Gly                                                                   |
| 51                | 45                      | GlcNAc $\beta$ 1-2Man $\alpha$ 1-3(GlcNAc $\beta$ 1-2Man $\alpha$ 1-6)Man $\beta$ 1-4GlcNAc $\beta$ 1-4GlcNAc $\beta$ -Gly                               |
| 52                | 46                      | Gal $\beta$ 1-4GlcNAc $\beta$ 1-2Man $\alpha$ 1-3(Gal $\beta$ 1-4GlcNAc $\beta$ 1-2Man $\alpha$ 1-6)Man $\beta$ 1-4GlcNAc $\beta$ 1-4GlcNAc $\beta$ -Gly |

|    |    |                                                                                                    |
|----|----|----------------------------------------------------------------------------------------------------|
| 53 | 47 | Neu5Aca2-6Galβ1-4GlcNAcβ1-2Mana1-3(Neu5Aca2-6Galβ1-4GlcNAcβ1-2Mana1-6)Manβ1-4GlcNAcβ1-4GlcNAcβ-Gly |
| 54 | 48 | Neu5Aca2-6Galβ1-4GlcNAcβ1-2Mana1-3(Neu5Aca2-6Galβ1-4GlcNAcβ1-2Mana1-6)Manβ1-4GlcNAcβ1-4GlcNAcβ-Sp8 |
| 55 | 49 | Fuca1-2Galβ1-3GalNAcβ1-3Galα-Sp9                                                                   |
| 56 | 50 | Fuca1-2Galβ1-3GalNAcβ1-3Galα1-4Galβ1-4Glcβ-Sp9                                                     |
| 57 | 51 | Fuca1-2Galβ1-3(Fuca1-4)GlcNAcβ-Sp8                                                                 |
| 58 | 52 | Fuca1-2Galβ1-3GalNAcα-Sp8                                                                          |
| 59 | 53 | Fuca1-2Galβ1-3GalNAcβ1-4(Neu5Aca2-3)Galβ1-4Glcβ-Sp0                                                |
| 60 | 54 | Fuca1-2Galβ1-3GalNAcβ1-4(Neu5Aca2-3)Galβ1-4Glcβ-Sp9                                                |
| 61 | 55 | Fuca1-2Galβ1-3GlcNAcβ1-3Galβ1-4Glcβ-Sp10                                                           |
| 62 | 56 | Fuca1-2Galβ1-3GlcNAcβ1-3Galβ1-4Glcβ-Sp8                                                            |
| 63 | 57 | Fuca1-2Galβ1-3GlcNAcβ-Sp0                                                                          |
| 64 | 58 | Fuca1-2Galβ1-3GlcNAcβ-Sp8                                                                          |
| 65 | 59 | Fuca1-2Galβ1-4(Fuca1-3)GlcNAcβ1-3Galβ1-4(Fuca1-3)GlcNAcβ-Sp0                                       |
| 66 | 60 | Fuca1-2Galβ1-4(Fuca1-3)GlcNAcβ1-3Galβ1-4(Fuca1-3)GlcNAcβ1-3Galβ1-4(Fuca1-3)GlcNAcβ-Sp0             |
| 67 | 61 | Fuca1-2Galβ1-4(Fuca1-3)GlcNAcβ-Sp0                                                                 |
| 68 | 62 | Fuca1-2Galβ1-4(Fuca1-3)GlcNAcβ-Sp8                                                                 |
| 69 | 63 | Fuca1-2Galβ1-4GlcNAcβ1-3Galβ1-4GlcNAc-Sp0                                                          |
| 70 | 64 | Fuca1-2Galβ1-4GlcNAcβ1-3Galβ1-4GlcNAcβ1-3Galβ1-4GlcNAcβ-Sp0                                        |
| 71 | 65 | Fuca1-2Galβ1-4GlcNAcβ-Sp0                                                                          |
| 72 | 66 | Fuca1-2Galβ1-4GlcNAcβ-Sp8                                                                          |
| 73 | 67 | Fuca1-2Galβ1-4Glcβ-Sp0                                                                             |
| 74 | 68 | Fuca1-2Galβ-Sp8                                                                                    |
| 75 | 69 | Fuca1-3GlcNAcβ-Sp8                                                                                 |
| 76 | 70 | Fuca1-3GlcNAcβ-Sp8                                                                                 |
| 77 | 71 | Fuca1-4GlcNAcβ-Sp8                                                                                 |
| 78 | 72 | Fucβ1-3GlcNAcβ-Sp8                                                                                 |
| 79 | 73 | GalNAcα1-3(Fuca1-2)Galβ1-3GlcNAcβ-Sp0                                                              |
| 80 | 74 | GalNAcα1-3(Fuca1-2)Galβ1-4(Fuca1-3)GlcNAcβ-Sp0                                                     |
| 81 | 75 | GalNAcα1-3(Fuca1-2)Galβ1-4GlcNAcβ-Sp0                                                              |
| 82 | 76 | GalNAcα1-3(Fuca1-2)Galβ1-4GlcNAcβ-Sp8                                                              |
| 83 | 77 | GalNAcα1-3(Fuca1-2)Galβ1-4Glcβ-Sp0                                                                 |
| 84 | 78 | GalNAcα1-3(Fuca1-2)Galβ-Sp8                                                                        |
| 85 | 79 | GalNAcα1-3GalNAcβ-Sp8                                                                              |
| 86 | 80 | GalNAcα1-3Galβ-Sp8                                                                                 |
| 87 | 81 | GalNAcα1-4(Fuca1-2)Galβ1-4GlcNAcβ-Sp8                                                              |
| 88 | 82 | GalNAcβ1-3GalNAcα-Sp8                                                                              |
| 89 | 83 | GalNAcβ1-3(Fuca1-2)Galβ-Sp8                                                                        |
| 90 | 84 | GalNAcβ1-3Galα1-4Galβ1-4GlcNAcβ-Sp0                                                                |
| 91 | 85 | GalNAcβ1-4(Fuca1-3)GlcNAcβ-Sp0                                                                     |
| 92 | 86 | GalNAcβ1-4GlcNAcβ-Sp0                                                                              |
| 93 | 87 | GalNAcβ1-4GlcNAcβ-Sp8                                                                              |
| 94 | 88 | Galα1-2Galβ-Sp8                                                                                    |
| 95 | 89 | Galα1-3(Fuca1-2)Galβ1-3GlcNAcβ-Sp0                                                                 |
| 96 | 90 | Galα1-3(Fuca1-2)Galβ1-4(Fuca1-3)GlcNAcβ-Sp0                                                        |
| 97 | 91 | Galα1-3(Fuca1-2)Galβ1-4GlcNAc-Sp0                                                                  |
| 98 | 92 | Galα1-3(Fuca1-2)Galβ1-4Glcβ-Sp0                                                                    |
| 99 | 93 | Galα1-3(Fuca1-2)Galβ-Sp8                                                                           |

|     |     |                                                                                                                                 |
|-----|-----|---------------------------------------------------------------------------------------------------------------------------------|
| 100 | 94  | Gal $\alpha$ 1-3(Gal $\alpha$ 1-4)Gal $\beta$ 1-4GlcNAc $\beta$ -Sp8                                                            |
| 101 | 95  | Gal $\alpha$ 1-3GalNAc $\alpha$ -Sp8                                                                                            |
| 102 | 96  | Gal $\alpha$ 1-3GalNAc $\beta$ -Sp8                                                                                             |
| 103 | 97  | Gal $\alpha$ 1-3Gal $\beta$ 1-4(Fuca1-3)GlcNAc $\beta$ -Sp8                                                                     |
| 104 | 98  | Gal $\alpha$ 1-3Gal $\beta$ 1-3GlcNAc $\beta$ -Sp0                                                                              |
| 105 | 99  | Gal $\alpha$ 1-3Gal $\beta$ 1-4GlcNAc $\beta$ -Sp8                                                                              |
| 106 | 100 | Gal $\alpha$ 1-3Gal $\beta$ 1-4Glc $\beta$ -Sp0                                                                                 |
| 107 | 101 | Gal $\alpha$ 1-3Gal $\beta$ -Sp8                                                                                                |
| 108 | 102 | Gal $\alpha$ 1-4(Fuca1-2)Gal $\beta$ 1-4GlcNAc $\beta$ -Sp8                                                                     |
| 109 | 103 | Gal $\alpha$ 1-4Gal $\beta$ 1-4GlcNAc $\beta$ -Sp0                                                                              |
| 110 | 104 | Gal $\alpha$ 1-4Gal $\beta$ 1-4GlcNAc $\beta$ -Sp8                                                                              |
| 111 | 105 | Gal $\alpha$ 1-4Gal $\beta$ 1-4Glc $\beta$ -Sp0                                                                                 |
| 112 | 106 | Gal $\alpha$ 1-4GlcNAc $\beta$ -Sp8                                                                                             |
| 113 | 107 | Gal $\alpha$ 1-6Glc $\beta$ -Sp8                                                                                                |
| 114 | 108 | Gal $\beta$ 1-2Gal $\beta$ -Sp8                                                                                                 |
| 115 | 109 | Gal $\beta$ 1-3(Fuca1-4)GlcNAc $\beta$ 1-3Gal $\beta$ 1-4(Fuca1-3)GlcNAc $\beta$ -Sp0                                           |
| 116 | 110 | Gal $\beta$ 1-3(Fuca1-4)GlcNAc $\beta$ 1-3Gal $\beta$ 1-4GlcNAc $\beta$ -Sp0                                                    |
| 117 | 111 | Gal $\beta$ 1-3(Fuca1-4)GlcNAc-Sp0                                                                                              |
| 118 | 112 | Gal $\beta$ 1-3(Fuca1-4)GlcNAc-Sp8                                                                                              |
| 119 | 113 | Gal $\beta$ 1-3(Fuca1-4)GlcNAc $\beta$ -Sp8                                                                                     |
| 120 | 114 | Gal $\beta$ 1-3(Gal $\beta$ 1-4GlcNAc $\beta$ 1-6)GalNAc $\alpha$ -Sp8                                                          |
| 121 | 115 | Gal $\beta$ 1-3(GlcNAc $\beta$ 1-6)GalNAc $\alpha$ -Sp8                                                                         |
| 122 | 116 | Gal $\beta$ 1-3(Neu5Ac $\alpha$ 2-6)GalNAc $\alpha$ -Sp8                                                                        |
| 123 | 117 | Gal $\beta$ 1-3(Neu5Ac $\beta$ 2-6)GalNAc $\alpha$ -Sp8                                                                         |
| 124 | 118 | Gal $\beta$ 1-3(Neu5Ac $\alpha$ 2-6)GlcNAc $\beta$ 1-4Gal $\beta$ 1-4Glc $\beta$ -Sp10                                          |
| 125 | 119 | Gal $\beta$ 1-3GalNAc $\alpha$ -Sp8                                                                                             |
| 126 | 120 | Gal $\beta$ 1-3GalNAc $\beta$ -Sp8                                                                                              |
| 127 | 121 | Gal $\beta$ 1-3GalNAc $\beta$ 1-3Gal $\alpha$ 1-4Gal $\beta$ 1-4Glc $\beta$ -Sp0                                                |
| 128 | 122 | Gal $\beta$ 1-3GalNAc $\beta$ 1-4(Neu5Ac $\alpha$ 2-3)Gal $\beta$ 1-4Glc $\beta$ -Sp0                                           |
| 129 | 123 | Gal $\beta$ 1-3GalNAc $\beta$ 1-4Gal $\beta$ 1-4Glc $\beta$ -Sp8                                                                |
| 130 | 124 | Gal $\beta$ 1-3Gal $\beta$ -Sp8                                                                                                 |
| 131 | 125 | Gal $\beta$ 1-3GlcNAc $\beta$ 1-3Gal $\beta$ 1-4GlcNAc $\beta$ -Sp0                                                             |
| 132 | 126 | Gal $\beta$ 1-3GlcNAc $\beta$ 1-3Gal $\beta$ 1-4Glc $\beta$ -Sp10                                                               |
| 133 | 127 | Gal $\beta$ 1-3GlcNAc $\beta$ -Sp0                                                                                              |
| 134 | 128 | Gal $\beta$ 1-3GlcNAc $\beta$ -Sp8                                                                                              |
| 135 | 129 | Gal $\beta$ 1-4(Fuca1-3)GlcNAc $\beta$ -Sp0                                                                                     |
| 136 | 130 | Gal $\beta$ 1-4(Fuca1-3)GlcNAc $\beta$ -Sp8                                                                                     |
| 137 | 131 | Gal $\beta$ 1-4(Fuca1-3)GlcNAc $\beta$ 1-4Gal $\beta$ 1-4(Fuca1-3)GlcNAc $\beta$ -Sp0                                           |
| 138 | 132 | Gal $\beta$ 1-4(Fuca1-3)GlcNAc $\beta$ 1-4Gal $\beta$ 1-4(Fuca1-3)GlcNAc $\beta$ 1-4Gal $\beta$ 1-4(Fuca1-3)GlcNAc $\beta$ -Sp0 |
| 139 | 133 | Gal $\beta$ 1-4[6OSO3]Glc $\beta$ -Sp0                                                                                          |
| 140 | 134 | Gal $\beta$ 1-4[6OSO3]Glc $\beta$ -Sp8                                                                                          |
| 141 | 135 | Gal $\beta$ 1-4GalNAc $\alpha$ 1-3(Fuca1-2)Gal $\beta$ 1-4GlcNAc $\beta$ -Sp8                                                   |
| 142 | 136 | Gal $\beta$ 1-4GalNAc $\beta$ 1-3(Fuca1-2)Gal $\beta$ 1-4GlcNAc $\beta$ -Sp8                                                    |
| 143 | 137 | Gal $\beta$ 1-4GlcNAc $\beta$ 1-3(Gal $\beta$ 1-4GlcNAc $\beta$ 1-6)GalNAc $\alpha$ -Sp8                                        |
| 144 | 138 | Gal $\beta$ 1-4GlcNAc $\beta$ 1-3GalNAc $\alpha$ -Sp8                                                                           |
| 145 | 139 | Gal $\beta$ 1-4GlcNAc $\beta$ 1-3Gal $\beta$ 1-4(Fuca1-3)GlcNAc $\beta$ 1-3Gal $\beta$ 1-4(Fuca1-3)GlcNAc $\beta$ -Sp0          |
| 146 | 140 | Gal $\beta$ 1-4GlcNAc $\beta$ 1-3Gal $\beta$ 1-4GlcNAc $\beta$ 1-3Gal $\beta$ 1-4GlcNAc $\beta$ -Sp0                            |
| 147 | 141 | Gal $\beta$ 1-4GlcNAc $\beta$ 1-3Gal $\beta$ 1-4GlcNAc $\beta$ -Sp0                                                             |
| 148 | 142 | Gal $\beta$ 1-4GlcNAc $\beta$ 1-3Gal $\beta$ 1-4Glc $\beta$ -Sp0                                                                |

|     |     |                                                                                        |
|-----|-----|----------------------------------------------------------------------------------------|
| 149 | 143 | Galβ1-4GlcNAcβ1-3Galβ1-4Glcβ-Sp8                                                       |
| 150 | 144 | Galβ1-4GlcNAcβ1-6(Galβ1-3)GalNAcα-Sp8                                                  |
| 151 | 145 | Galβ1-4GlcNAcβ1-6GalNAcα-Sp8                                                           |
| 152 | 146 | Galβ1-4GlcNAcβ-Sp0                                                                     |
| 153 | 147 | Galβ1-4GlcNAcβ-Sp8                                                                     |
| 154 | 148 | Galβ1-4Glcβ-Sp0                                                                        |
| 155 | 149 | Galβ1-4Glcβ-Sp8                                                                        |
| 156 | 150 | GlcNAcα1-3Galβ1-4GlcNAcβ-Sp8                                                           |
| 157 | 151 | GlcNAcα1-6Galβ1-4GlcNAcβ-Sp8                                                           |
| 158 | 152 | GlcNAcβ1-2Galβ1-3GalNAcα-Sp8                                                           |
| 159 | 153 | GlcNAcβ1-3(GlcNAcβ1-6)GalNAcα-Sp8                                                      |
| 160 | 154 | GlcNAcβ1-3(GlcNAcβ1-6)Galβ1-4GlcNAcβ-Sp8                                               |
| 161 | 155 | GlcNAcβ1-3GalNAcα-Sp8                                                                  |
| 162 | 156 | GlcNAcβ1-3Galβ-Sp8                                                                     |
| 163 | 157 | GlcNAcβ1-3Galβ1-3GalNAcα-Sp8                                                           |
| 164 | 158 | GlcNAcβ1-3Galβ1-4GlcNAcβ-Sp0                                                           |
| 165 | 159 | GlcNAcβ1-3Galβ1-4GlcNAcβ-Sp8                                                           |
| 166 | 160 | GlcNAcβ1-3Galβ1-4GlcNAcβ1-3Galβ1-4GlcNAcβ-Sp0                                          |
| 167 | 161 | GlcNAcβ1-3Galβ1-4Glcβ-Sp0                                                              |
| 168 | 162 | GlcNAcβ1-4MDPLys                                                                       |
| 169 | 163 | GlcNAcβ1-4(GlcNAcβ1-6)GalNAcα-Sp8                                                      |
| 170 | 164 | GlcNAcβ1-4Galβ1-4GlcNAcβ-Sp8                                                           |
| 171 | 165 | (GlcNAcβ1-4)6β-Sp8                                                                     |
| 172 | 166 | (GlcNAcβ1-4)5β-Sp8                                                                     |
| 173 | 167 | GlcNAcβ1-4GlcNAcβ1-4GlcNAcβ-Sp8                                                        |
| 174 | 168 | GlcNAcβ1-6(Galβ1-3)GalNAcα-Sp8                                                         |
| 175 | 169 | GlcNAcβ1-6GalNAcα-Sp8                                                                  |
| 176 | 170 | GlcNAcβ1-6Galβ1-4GlcNAcβ-Sp8                                                           |
| 177 | 171 | Glcα1-4Glcβ-Sp8                                                                        |
| 178 | 172 | Glcα1-4Glcα-Sp8                                                                        |
| 179 | 173 | Glcα1-6Glcα1-6Glcβ-Sp8                                                                 |
| 180 | 174 | Glcβ1-4Glcβ-Sp8                                                                        |
| 181 | 175 | Glcβ1-6Glcβ-Sp8                                                                        |
| 182 | 176 | Sorbitol-Sp8                                                                           |
| 183 | 177 | GlcAα-Sp8                                                                              |
| 184 | 178 | GlcAβ-Sp8                                                                              |
| 185 | 179 | GlcAβ1-3Galβ-Sp8                                                                       |
| 186 | 180 | GlcAβ1-6Galβ-Sp8                                                                       |
| 187 | 181 | KDNα2-3Galβ1-3GlcNAcβ-Sp0                                                              |
| 188 | 182 | KDNα2-3Galβ1-4GlcNAcβ-Sp0                                                              |
| 189 | 183 | Manα1-2Manα1-2Manα1-3Manα-Sp9                                                          |
| 190 | 184 | Manα1-2Manα1-3(Manα1-2Manα1-6)Manα-Sp9                                                 |
| 191 | 185 | Manα1-2Manα1-3Manα-Sp9                                                                 |
| 192 | 186 | Manα1-6(Manα1-2Manα1-3)Manα1-6(Manα2Manα1-3)Manβ1-4GlcNAcβ1-4GlcNAcβ-N                 |
| 193 | 187 | Manα1-2Manα1-6(Manα1-3)Manα1-6(Manα2Manα2Manα1-3)Manβ1-4GlcNAcβ1-4GlcNAcβ-N            |
| 194 | 188 | Manα1-2Manα1-2Manα1-3(Manα1-2Manα1-3(Manα1-2Manα1-6)Manα1-6)Manβ1-4GlcNAcβ1-4GlcNAcβ-N |
| 195 | 189 | Manα1-3(Manα1-6)Manα-Sp9                                                               |

|     |     |                                                                                                                                           |
|-----|-----|-------------------------------------------------------------------------------------------------------------------------------------------|
| 196 | 190 | Man $\alpha$ 1-3(Man $\alpha$ 1-2Man $\alpha$ 1-2Man $\alpha$ 1-6)Man $\alpha$ -Sp9                                                       |
| 197 | 191 | Man $\alpha$ 1-6(Man $\alpha$ 1-3)Man $\alpha$ 1-6(Man $\alpha$ 2Man $\alpha$ 1-3)Man $\beta$ 1-4GlcNAc $\beta$ 1-4GlcNAc $\beta$ -N      |
| 198 | 192 | Man $\alpha$ 1-6(Man $\alpha$ 1-3)Man $\alpha$ 1-6(Man $\alpha$ 1-3)Man $\beta$ 1-4GlcNAc $\beta$ 1-4GlcNAc $\beta$ -N                    |
| 199 | 193 | Man5 <sub>9</sub> mix N                                                                                                                   |
| 200 | 194 | Man $\beta$ 1-4GlcNAc $\beta$ -Sp0                                                                                                        |
| 201 | 195 | Neu5Aca2-3(Gal $\beta$ 1-3GalNAc $\beta$ 1-4)Gal $\beta$ 1-4Glc $\beta$ -Sp0                                                              |
| 202 | 196 | Neu5Aca2-3Gal $\beta$ 1-3GalNAc $\alpha$ -Sp8                                                                                             |
| 203 | 197 | NeuAca2-8NeuAca2-8NeuAca2-8NeuAca2-3(GalNAc $\beta$ 1-4)Gal $\beta$ 1-4Glc $\beta$ -Sp0                                                   |
| 204 | 198 | Neu5Aca2-8Neu5Aca2-8Neu5Aca2-3(GalNAc $\beta$ 1-4)Gal $\beta$ 1-4Glc $\beta$ -Sp0                                                         |
| 205 | 199 | Neu5Aca2-8Neu5Aca2-8Neu5Aca2-3Gal $\beta$ 1-4Glc $\beta$ -Sp0                                                                             |
| 206 | 200 | Neu5Aca2-8Neu5Aca2-3(GalNAc $\beta$ 1-4)Gal $\beta$ 1-4Glc $\beta$ -Sp0                                                                   |
| 207 | 201 | Neu5Aca2-8Neu5Aca2-8Neu5Aca $\alpha$ -Sp8                                                                                                 |
| 208 | 202 | Neu5Aca2-3(6-O-Su)Gal $\beta$ 1-4(Fuca1-3)GlcNAc $\beta$ -Sp8                                                                             |
| 209 | 203 | Neu5Aca2-3(GalNAc $\beta$ 1-4)Gal $\beta$ 1-4GlcNAc $\beta$ -Sp0                                                                          |
| 210 | 204 | Neu5Aca2-3(GalNAc $\beta$ 1-4)Gal $\beta$ 1-4GlcNAc $\beta$ -Sp8                                                                          |
| 211 | 205 | Neu5Aca2-3(GalNAc $\beta$ 1-4)Gal $\beta$ 1-4Glc $\beta$ -Sp0                                                                             |
| 212 | 206 | NeuAca2-3(NeuAca2-3Gal $\beta$ 1-3GalNAc $\beta$ 1-4)Gal $\beta$ 1-4Glc $\beta$ -Sp0                                                      |
| 213 | 207 | Neu5Aca2-3(Neu5Aca2-6)GalNAc $\alpha$ -Sp8                                                                                                |
| 214 | 208 | Neu5Aca2-3GalNAc $\alpha$ -Sp8                                                                                                            |
| 215 | 209 | Neu5Aca2-3GalNAc $\beta$ 1-4GlcNAc $\beta$ -Sp0                                                                                           |
| 216 | 210 | Neu5Aca2-3Gal $\beta$ 1-3(6OSO3)GlcNAc-Sp8                                                                                                |
| 217 | 211 | Neu5Aca2-3Gal $\beta$ 1-3(Fuca1-4)GlcNAc $\beta$ -Sp8                                                                                     |
| 218 | 212 | NeuAca2-3Gal $\beta$ 1-3(Fuca1-4)GlcNAc $\beta$ 1-3Gal $\beta$ 1-4(Fuca1-3)GlcNAc $\beta$ Sp0                                             |
| 219 | 213 | Neu5Aca2-3Gal $\beta$ 1-3(Neu5Aca2-3Gal $\beta$ 1-4)GlcNAc $\beta$ -Sp8                                                                   |
| 220 | 214 | Neu5Aca2-3Gal $\beta$ 1-3[6OSO3]GalNAc $\alpha$ -Sp8                                                                                      |
| 221 | 215 | Neu5Aca2-3Gal $\beta$ 1-3(Neu5Aca2-6)GalNAc $\alpha$ -Sp8                                                                                 |
| 222 | 216 | Neu5Aca2-3Gal $\beta$ -Sp8                                                                                                                |
| 223 | 217 | NeuAca2-3Gal $\beta$ 1-3GalNAc $\beta$ 1-3Gal $\alpha$ 1-4Gal $\beta$ 1-4Glc $\beta$ -Sp0                                                 |
| 224 | 218 | NeuAca2-3Gal $\beta$ 1-3GlcNAc $\beta$ 1-3Gal $\beta$ 1-4GlcNAc $\beta$ -Sp0                                                              |
| 225 | 219 | Neu5Aca2-3Gal $\beta$ 1-3GlcNAc $\beta$ -Sp0                                                                                              |
| 226 | 220 | Neu5Aca2-3Gal $\beta$ 1-3GlcNAc $\beta$ -Sp8                                                                                              |
| 227 | 221 | Neu5Aca2-3Gal $\beta$ 1-4[6OSO3]GlcNAc $\beta$ -Sp8                                                                                       |
| 228 | 222 | Neu5Aca2-3Gal $\beta$ 1-4(Fuca1-3)(6OSO3)GlcNAc $\beta$ -Sp8                                                                              |
| 229 | 223 | Neu5Aca2-3Gal $\beta$ 1-4(Fuca1-3)GlcNAc $\beta$ 1-3Gal $\beta$ 1-4(Fuca1-3)GlcNAc $\beta$ 1-3Gal $\beta$ 1-4(Fuca1-3)GlcNAc $\beta$ -Sp0 |
| 230 | 224 | Neu5Aca2-3Gal $\beta$ 1-4(Fuca1-3)GlcNAc $\beta$ -Sp0                                                                                     |
| 231 | 225 | Neu5Aca2-3Gal $\beta$ 1-4(Fuca1-3)GlcNAc $\beta$ -Sp8                                                                                     |
| 232 | 226 | Neu5Aca2-3Gal $\beta$ 1-4(Fuca1-3)GlcNAc $\beta$ 1-3Gal $\beta$ -Sp8                                                                      |
| 233 | 227 | Neu5Aca2-3Gal $\beta$ 1-4(Fuca1-3)GlcNAc $\beta$ 1-3Gal $\beta$ 1-4GlcNAc $\beta$ -Sp8                                                    |
| 234 | 228 | Neu5Aca2-3Gal $\beta$ 1-4GlcNAc $\beta$ 1-3Gal $\beta$ 1-4(Fuca1-3)GlcNAc-Sp0                                                             |
| 235 | 229 | Neu5Aca2-3Gal $\beta$ 1-4GlcNAc $\beta$ 1-3Gal $\beta$ 1-4GlcNAc $\beta$ 1-3Gal $\beta$ 1-4GlcNAc $\beta$ -Sp0                            |
| 236 | 230 | Neu5Aca2-3Gal $\beta$ 1-4GlcNAc $\beta$ -Sp0                                                                                              |
| 237 | 231 | Neu5Aca2-3Gal $\beta$ 1-4GlcNAc $\beta$ -Sp8                                                                                              |
| 238 | 232 | Neu5Aca2-3Gal $\beta$ 1-4GlcNAc $\beta$ 1-3Gal $\beta$ 1-4GlcNAc $\beta$ -Sp0                                                             |
| 239 | 233 | Neu5Aca2-3Gal $\beta$ 1-4Glc $\beta$ -Sp0                                                                                                 |
| 240 | 234 | Neu5Aca2-3Gal $\beta$ 1-4Glc $\beta$ -Sp8                                                                                                 |
| 241 | 235 | Neu5Aca2-6(Gal $\beta$ 1-3)GalNAc $\alpha$ -Sp8                                                                                           |
| 242 | 236 | Neu5Aca2-6GalNAc $\alpha$ -Sp8                                                                                                            |
| 243 | 237 | Neu5Aca2-6GalNAc $\beta$ 1-4GlcNAc $\beta$ -Sp0                                                                                           |
| 244 | 238 | Neu5Aca2-6Gal $\beta$ 1-4[6OSO3]GlcNAc $\beta$ -Sp8                                                                                       |

|     |     |                                                                                  |
|-----|-----|----------------------------------------------------------------------------------|
| 245 | 239 | Neu5Aca2-6Galβ1-4GlcNAcβ-Sp0                                                     |
| 246 | 240 | Neu5Aca2-6Galβ1-4GlcNAcβ-Sp8                                                     |
| 247 | 241 | Neu5Aca2-6Galβ1-4GlcNAcβ1-3Galβ1-4(Fuca1-3)GlcNAcβ1-3Galβ1-4(Fuca1-3)GlcNAcβ-Sp0 |
| 248 | 242 | Neu5Aca2-6Galβ1-4GlcNAcβ1-3Galβ1-4GlcNAcβ-Sp0                                    |
| 249 | 243 | Neu5Aca2-6Galβ1-4Glcβ-Sp0                                                        |
| 250 | 244 | Neu5Aca2-6Galβ1-4Glcβ-Sp8                                                        |
| 251 | 245 | Neu5Aca2-6Galβ-Sp8                                                               |
| 252 | 246 | Neu5Aca2-8Neu5Aca-Sp8                                                            |
| 253 | 247 | Neu5Aca2-8Neu5Aca2-3Galβ1-4Glcβ-Sp0                                              |
| 254 | 248 | Neu5Acβ2-6GalNAcα-Sp8                                                            |
| 255 | 249 | Neu5Acβ2-6Galβ1-4GlcNAcβ-Sp8                                                     |
| 256 | 250 | Neu5Acβ2-6(Galβ1-3)GalNAcα-Sp8                                                   |
| 257 | 251 | Neu5Gca2-3Galβ1-3(Fuca1-4)GlcNAcβ-Sp0                                            |
| 258 | 252 | Neu5Gca2-3Galβ1-3GlcNAcβ-Sp0                                                     |
| 259 | 253 | Neu5Gca2-3Galβ1-4(Fuca1-3)GlcNAcβ-Sp0                                            |
| 260 | 254 | Neu5Gca2-3Galβ1-4GlcNAcβ-Sp0                                                     |
| 261 | 255 | Neu5Gca2-3Galβ1-4Glcβ-Sp0                                                        |
| 262 | 256 | Neu5Gca2-6GalNAcα-Sp0                                                            |
| 263 | 257 | Neu5Gca2-6Galβ1-4GlcNAcβ-Sp0                                                     |
| 264 | 258 | Neu5Gca-Sp8                                                                      |
| 265 | 259 | [3OSO3]Galβ1-4(Fuca1-3)(6OSO3)Glc-Sp0                                            |
| 266 | 260 | [3OSO3]Galβ1-4(Fuca1-3)Glc-Sp0                                                   |
| 267 | 261 | [3OSO3]Galβ1-4[Fuca1-3][6OSO3]GlcNAc-Sp8                                         |
| 268 | 262 | [3OSO3]Galβ1-4[Fuca1-3]GlcNAc-Sp0                                                |
| 269 | 263 | Fuca1-2[6OSO3]Galβ1-4GlcNAc-Sp0                                                  |
| 270 | 264 | Fuca1-2Galβ1-4[6OSO3]GlcNAc-Sp8                                                  |
| 271 | 265 | Fuca1-2[6OSO3]Galβ1-4[6OSO3]Glc-Sp0                                              |
| 272 | 266 | Fuca1-2-(6OSO3)-Galβ1-4Glc-Sp0                                                   |
| 273 | 267 | Fuca1-2-Galβ1-4[6OSO3]Glc-Sp0                                                    |
| 274 | 268 | Galβ1-3(Fuca1-4)GlcNAcβ1-3Galβ1-3(Fuca1-4)GlcNAcβ-Sp0                            |
| 275 | 269 | Galβ1-3-(Galβ1-4GlcNAcβ1-6)GalNAc-T                                              |
| 276 | 270 | Galβ1-3(GlcNAcβ1-6)GalNAc-T                                                      |
| 277 | 271 | Galβ1-3-(Neu5Aca2-3Galβ1-4GlcNAcβ1-6)GalNAc-T                                    |
| 278 | 272 | Galβ1-3GalNAc-T                                                                  |
| 279 | 273 | Galβ1-3GlcNAcβ1-3Galβ1-3GlcNAcβ-Sp0                                              |
| 280 | 274 | Galβ1-4[Fuca1-3][6OSO3]GlcNAc-Sp0                                                |
| 281 | 275 | Galβ1-4[Fuca1-3][6OSO3]Glc-Sp0                                                   |
| 282 | 276 | Galβ1-4(Fuca1-3)GlcNAcβ1-3Galβ1-3(Fuca1-4)GlcNAcβ-Sp0                            |
| 283 | 277 | Galβ1-4GlcNAcβ1-3Galβ1-3GlcNAcβ-Sp0                                              |
| 284 | 278 | Neu5Aca2-3Galβ1-3GlcNAcβ1-3Galβ1-3GlcNAcβ-Sp0                                    |
| 285 | 279 | Neu5Aca2-3Galβ1-4GlcNAcβ1-3Galβ1-3GlcNAcβ-Sp0                                    |
